# Supplementary material for: Syncytiotrophoblast extracellular vesicles impair rat uterine vascular function via the lectin-like oxidized LDL receptor-1
Source: PubMed Central journal article supplement (PMC5495440; doi:10.1371/journal.pone.0180364), 2017-07-03
Supplement: pone.0180364.s001.pdf [file pone.0180364.s001.pdf]

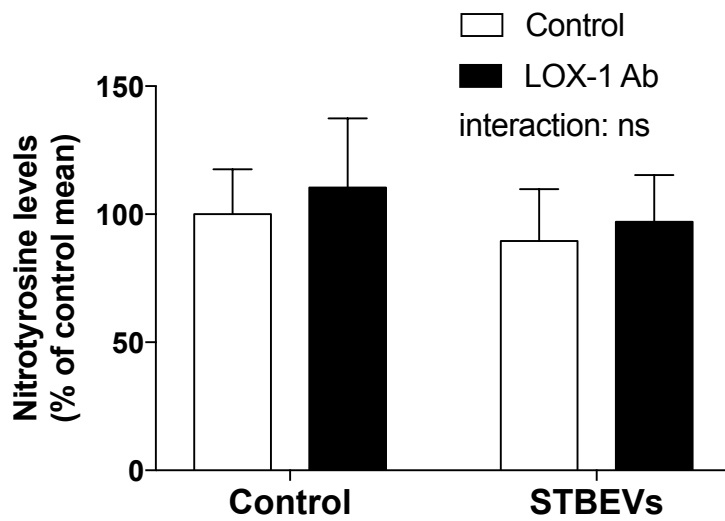

**S1 Fig. The effect of STBEVs on nitrotyrosine levels in uterine arteries.** No differences in nitrotyrosine levels were observed between all of the experimental groups. Bars represent means  $\pm$  SEM; two-way ANOVA. ns=not significant. n=6-7/group.
